# Supplementary material for: Bi/AC modified with phosphoric acid as catalyst in the hydrochlorination of acetylene
Source: Royal Society of Chemistry journal article supplement (doi:10.1039/c6ra26845e), 2017-01-01
Supplement: c6ra26845e1.pdf [file c6ra26845e1.pdf]

1 Supplementary Information for

2 **Bi/AC modified with phosphoric acid as catalyst in the hydrochlorination of**

3 **acetylene**

4 Di Hu, Feng Wang\*, Jide Wang\*

5 Key Laboratory of Oil & Gas Fine Chemicals Ministry of Education, Xinjiang

6 University, Urumqi 830046, Xinjiang, People's Republic of China.

7

8 \* To whom correspondence may be addressed.

9 Tel.: +86-0991-8582809; Fax: +86-0991-8582809.

10 *E-mail address:* [wangfeng62@126.com](mailto:wangfeng62@126.com) (F. Wang).

- 12 **Table of contents:**
- 13 **Fig. S1.** XRD pattern of fresh BiP<sub>3</sub>/AC catalyst.
- 14 **Fig. S2.** Particle distribution of fresh Bi/AC (a) and BiP<sub>0.5</sub>/AC.
- 15 **Table S1.** Metal particle size of Bi-based catalysts calculated from Scherrer's formula.
- 16 **Table S2.** Structural characteristics and catalytic properties of the as-prepared catalysts.

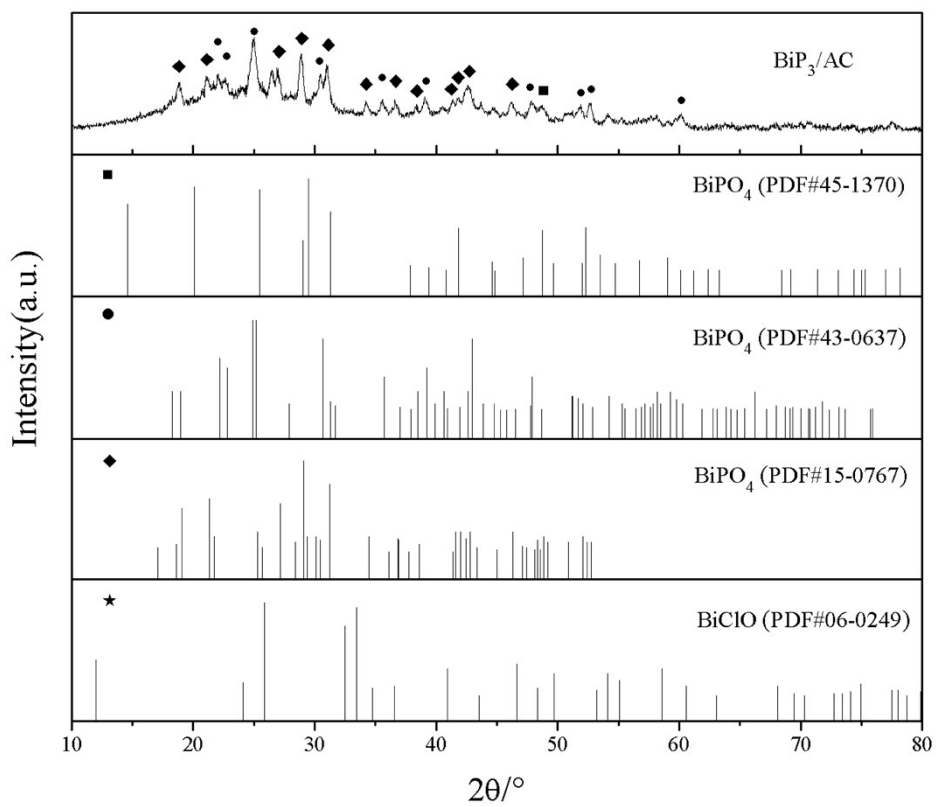

18

19 **Fig. S1.** XRD pattern of fresh  $\text{BiP}_3/\text{AC}$  catalyst

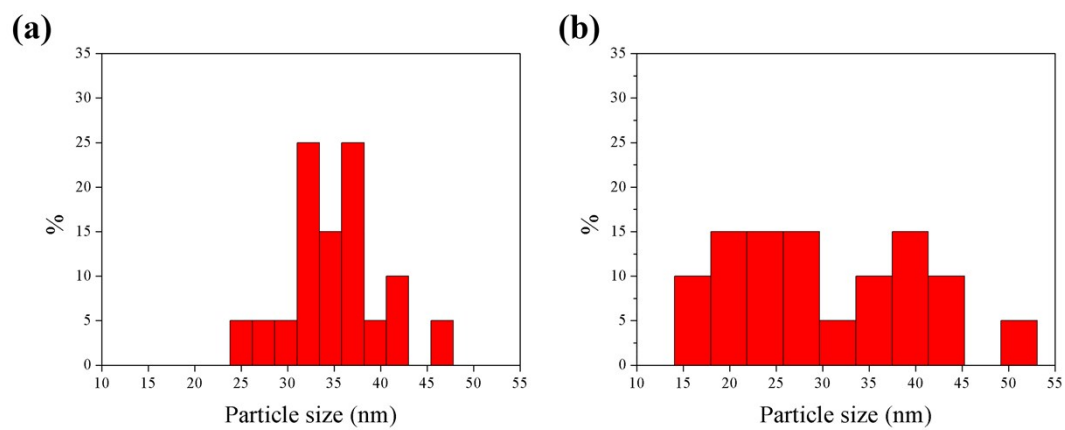

21

22 **Fig. S2.** Particle distribution of fresh Bi/AC (a) and BiP<sub>0.5</sub>/AC.

24 **Table S1**

25 Metal particle size of Bi-based catalysts caculated from Scherrer's formula

| Catalyst               | $2\theta \pm 0.01$ | <i>hkl</i>         | FWHM (degree) | Metal particle size (nm) |
|------------------------|--------------------|--------------------|---------------|--------------------------|
| Bi/AC                  | 25.88              | (101) <sup>a</sup> | 0.210         | 38.4                     |
| BiP <sub>0.1</sub> /AC | 25.76              | (101) <sup>a</sup> | 0.221         | 36.5                     |
| BiP <sub>0.5</sub> /AC | 25.90              | (101) <sup>a</sup> | 0.230         | 35.1                     |
| BiP <sub>1</sub> /AC   | 28.84              | (120) <sup>b</sup> | 0.295         | 27.5                     |
| BiP <sub>2</sub> /AC   | 29.09              | (120) <sup>b</sup> | 0.218         | 37.2                     |
| BiP <sub>3</sub> /AC   | 24.96              | (101) <sup>a</sup> | 0.462         | 17.4                     |

26 a: Tetragonal BiOCl JPCDS 06-0249

27 b: Monoclinic BiPO<sub>4</sub> JPCDS 15-0767

28

29 Scherrer's formula:

$$30 \quad D = \frac{0.9\lambda}{\beta \cos \theta};$$

31 Where  $\lambda$  is the radiation wavelength,  $\theta$  is the Bragg angle of selected peak, and  $\beta$  is

32 FWHM value.

34 **Table S2**35 Structural characteristics and catalytic properties of the as-prepared catalysts<sup>a</sup>

| Samples                | Content of Bi (%) | Conversion (%) | S <sub>BET</sub> (m <sup>2</sup> /g cat.) | B <sub>C<sub>2</sub>H<sub>2</sub><sup>m</sup></sub> (h <sup>-1</sup> ·g <sup>-1</sup> Bi) | B <sub>C<sub>2</sub>H<sub>2</sub><sup>S</sup></sub> (h <sup>-1</sup> ·m <sup>-2</sup> cat.) |
|------------------------|-------------------|----------------|-------------------------------------------|-------------------------------------------------------------------------------------------|---------------------------------------------------------------------------------------------|
| Bi/AC                  | 16.4              | 68.7%          | 288                                       | 44.7                                                                                      | 0.025                                                                                       |
| BiP <sub>0.1</sub> /AC | 15.7              | 58.5%          | 93                                        | 39.8                                                                                      | 0.067                                                                                       |
| BiP <sub>0.5</sub> /AC | 15.8              | 82.8%          | 346                                       | 55.9                                                                                      | 0.026                                                                                       |
| BiP <sub>1</sub> /AC   | 15.5              | 80.2%          | 315                                       | 55.2                                                                                      | 0.027                                                                                       |
| BiP <sub>2</sub> /AC   | 15.6              | 61.9%          | 64                                        | 42.3                                                                                      | 0.103                                                                                       |
| BiP <sub>3</sub> /AC   | 15.2              | 41.4%          | 55                                        | 29.1                                                                                      | 0.080                                                                                       |

36 <sup>a</sup> Reaction conditions: 5 g Bi-based catalysts, GHSV = 120 h<sup>-1</sup>, temperature (T) =37 160°C, feed volume ratio V(HCl) / V(C<sub>2</sub>H<sub>2</sub>) = 1.25.
